# Supplementary material for: Administration of rCTRP9 Attenuates Neuronal Apoptosis Through AdipoR1/PI3K/Akt Signaling Pathway after ICH in Mice
Source: PubMed Central journal article supplement — Cell Transplant. 2019 Jan 14;28(6):756–66. doi: 10.1177/0963689718822809 (PMC6686438; doi:10.1177/0963689718822809), 2019-01-14
Supplement: Additional_file_2_Table_S1.pdf [file Additional_file_2_Table_S1.pdf]

Supplementary Figure: Summary of experimental groups and mortality rate in the study.

| Experimental Groups          | Neurobehavior test | IHC | FJC | WB | Exclusion | Mortality(%) | Subtotal |
|------------------------------|--------------------|-----|-----|----|-----------|--------------|----------|
| <b>Experimental 1</b>        |                    |     |     |    |           |              |          |
| Sham                         |                    | 0   |     | 6  | 0         | 0            | 6        |
| ICH (3h, 6h, 12h, 24h, 72h)  |                    | 2   |     | 30 | 2         | 2(5.9%)      | 34       |
| <b>Experimental 2</b>        |                    |     |     |    |           |              |          |
| Sham                         | 6                  |     | 3   |    | 0         | 0            | 9        |
| ICH + Vehicle                | 6                  |     | 3   |    | 1         | 1(10.0%)     | 10       |
| ICH + rCTRP9 (0.1µg/g)       | 6                  |     | 3   |    | 2         | 2(18.18%)    | 11       |
| <b>Experimental 3</b>        |                    |     |     |    |           |              |          |
| Sham                         | 8                  |     |     |    |           |              | 8        |
| ICH + Vehicle                | 8                  |     |     |    | 2         | 2(20%)       | 10       |
| ICH + rCTRP9 (0.1µg/g)       | 8                  |     |     |    | 1         | 1(11.1%)     | 9        |
| <b>Experimental 4</b>        |                    |     |     |    |           |              |          |
| Sham                         |                    |     |     | 6  | 0         | 0            | 6        |
| ICH + Vehicle                |                    |     |     | 6  | 1         | 1(14.29%)    | 7        |
| ICH + rCTRP9 (0.1µg/g)       |                    |     |     | 6  | 1         | 1(14.29%)    | 7        |
| ICH + rCTRP9 + AdipoR1 siRNA |                    |     |     | 6  | 1         | 1(14.29%)    | 7        |
| ICH + rCTRP9 + Scr siRNA     |                    |     |     | 6  | 0         | 0            | 6        |
| ICH + rCTRP9 + LY294002      |                    |     |     | 6  | 2         | 2(12.5%)     | 8        |
| ICH + rCTRP9 + DMSO          |                    |     |     | 6  | 0         | 0            | 6        |
| <b>Total</b>                 | 42                 | 2   | 9   | 78 | 13        | 11.3%        | 144      |

ICH, intracerebral hemorrhage; WB, western blot; IHC, immunohistochemistry; DMSO, dimethyl sulfoxide
